# Supplementary material
Source: PubMed Central journal article supplement (PMC7145723)
Supplement: NIHMS1558435-supplement-Tables_S1-S4.pdf [file NIHMS1558435-supplement-Tables_S1-S4.pdf]

|                              | <b>Data collection #1<br/>(March 2018)</b> | <b>Data collection #2<br/>(October 2018)</b>                     |
|------------------------------|--------------------------------------------|------------------------------------------------------------------|
| <b>Microscope</b>            | FEI Titan Krios<br>(NRAMM Krios2)          | FEI Titan Krios<br>(NRAMM Krios3)                                |
| <b>Cs</b>                    | 2.7mm                                      | 2.7mm                                                            |
| <b>Voltage</b>               | 300 keV                                    | 300keV                                                           |
| <b>Detector</b>              | Gatan K2                                   | Gatan K2                                                         |
| <b>Magnification</b>         | 105,000x                                   | 105,000x                                                         |
| <b>Pixel size</b>            | 1.096Å/pix                                 | 1.06Å/pix<br>(rescaled to 1.096Å/pix<br>with motioncorr2 script) |
| <b>Dose rate</b>             | ~8 e <sup>-</sup> /Å <sup>2</sup> /sec     | ~8 e <sup>-</sup> /Å <sup>2</sup> /sec                           |
| <b>Total dose</b>            | 69.34 e <sup>-</sup> /Å <sup>2</sup>       | 73.92 e <sup>-</sup> /Å <sup>2</sup>                             |
| <b>Defocus range</b>         | 0.7-2.6 μm                                 | 0.8-4.4 μm                                                       |
| <b>Number of micrographs</b> | 1480                                       | 1299                                                             |

**Table S1. Data collection parameters, Related to Figure 1.**

|                                              | heterotrimer | dimer     | curved<br>VPS35/ VPS35<br>sub-structure | chain<br>interface I | flat<br>VPS35/VPS35<br>sub-structure | tetramer  | chain<br>interface II |
|----------------------------------------------|--------------|-----------|-----------------------------------------|----------------------|--------------------------------------|-----------|-----------------------|
| Total particles (autopicked)                 | 439,646      | 439,646   | 439,646                                 | 439,646              | 439,646                              | 439,646   | 443,117               |
| Box size (Å)                                 | 252x252      | 395x395   | 180x180                                 | 395x395              | 180x180                              | 329x329   | 482x482               |
| Particles in 2D classification               | 29,771       | 31,202    | 34,156                                  | 76,927               | 78,994                               | 6,126     | 15,234                |
| Particles in final 3D model                  | 26,369       | 31,022    | 32,435                                  | 75,790               | 69,195                               | 6,015     | 13,782                |
| Symmetry                                     | C1           | C1        | C1                                      | C2                   | C2                                   | C1        | C1                    |
| Map resolution<br>(Masked FSC 0.143, RELION) | 5.7 Å        | 9.3 Å     | 5.3 Å                                   | 6.9 Å                | 4.9 Å                                | 25.5 Å    | 16.9 Å                |
| B-factor                                     | -212         | -100*     | -58                                     | -189                 | -56                                  | --        | -212                  |
| EMDB accession code                          | EMD-21136    | EMD-21117 | EMD-21119                               | EMD-21116            | EMD-21135                            | EMD-21101 | EMD-21118             |
| <b><i>Refinement</i></b>                     |              |           |                                         |                      |                                      |           |                       |
| Program                                      | PHENIX       |           |                                         |                      | PHENIX                               |           |                       |
| Number atoms                                 | 9793         |           |                                         |                      | 7563                                 |           |                       |
| Molprobity score                             | 2.11         |           |                                         |                      | 2.25                                 |           |                       |
| Molprobity clash score                       | 17.05        |           |                                         |                      | 20.8                                 |           |                       |
| <i>RMSD from ideal</i>                       |              |           |                                         |                      |                                      |           |                       |
| Bond length (Å)                              | 0.006        |           |                                         |                      | 0.006                                |           |                       |
| Bond angles (°)                              | 1.067        |           |                                         |                      | 1.067                                |           |                       |
| <i>Ramachandran plot</i>                     |              |           |                                         |                      |                                      |           |                       |
| Favored (%)                                  | 94.5         |           |                                         |                      | 93.2                                 |           |                       |
| Allowed (%)                                  | 5.5          |           |                                         |                      | 6.8                                  |           |                       |
| Outliers (%)                                 | 0.0          |           |                                         |                      | 0.0                                  |           |                       |
| Rotamer outliers (%)                         | 0.55         |           |                                         |                      | 1.3                                  |           |                       |
| CC model-vs-map (masked)                     | 0.70         |           |                                         |                      | 0.64                                 |           |                       |
| Map resolution (FSC 0.143/0.5)               | 5.8/7.0 Å    |           |                                         |                      | 5.3/7.6 Å                            |           |                       |
| PDB ID                                       | 6VAC         |           |                                         |                      | 6VAB                                 |           |                       |

**Table S2. Data processing and refinement statistics. Related to Figure 1.** Data processing statistics are reported for all structures and sub-structures. The heterotrimer and flat VPS35/VPS35 sub-structure underwent real space refinement in PHENIX. Asterisks mark user-imposed B-factors to minimize noise and optimize contrast (see STAR Methods for details).

| Name    | Genotype                                                                                                                           | Annotation          | Source     |
|---------|------------------------------------------------------------------------------------------------------------------------------------|---------------------|------------|
| PXYR1A  | <i>MATa leu2-3,112 ura3-52 his3-Δ200 trp1-Δ901 suc2-Δ9 lys2-801 vps35Δ::KanMX6 vps26Δ::Hygro pRS315-VPS35 pRS416-VPS26</i>         | WT                  | This study |
| PXYR1B  | <i>MATa leu2-3,112 ura3-52 his3-Δ200 trp1-Δ901 suc2-Δ9 lys2-801 vps35Δ::KanMX6 vps26Δ::Hygro pRS315-VPS35 pRS416-VPS26</i>         | WT                  | This study |
| PXYR1C  | <i>MATa leu2-3,112 ura3-52 his3-Δ200 trp1-Δ901 suc2-Δ9 lys2-801 vps35Δ::KanMX6 vps26Δ::Hygro pRS315-VPS35 pRS416-VPS26</i>         | WT                  | This study |
| PXYR3A  | <i>MATa leu2-3,112 ura3-52 his3-Δ200 trp1-Δ901 suc2-Δ9 lys2-801 vps35Δ::KanMX6 vps26Δ::Hygro pRS315 pRS416-VPS26</i>               | VPS35 Knockout      | This study |
| PXYR3B  | <i>MATa leu2-3,112 ura3-52 his3-Δ200 trp1-Δ901 suc2-Δ9 lys2-801 vps35Δ::KanMX6 vps26Δ::Hygro pRS315 pRS416-VPS26</i>               | VPS35 Knockout      | This study |
| PXYR3C  | <i>MATa leu2-3,112 ura3-52 his3-Δ200 trp1-Δ901 suc2-Δ9 lys2-801 vps35Δ::KanMX6 vps26Δ::Hygro pRS315 pRS416-VPS26</i>               | VPS35 Knockout      | This study |
| PXYR4A  | <i>MATa leu2-3,112 ura3-52 his3-Δ200 trp1-Δ901 suc2-Δ9 lys2-801 vps35Δ::KanMX6 vps26Δ::Hygro pRS315-vps35 3KE pRS416-VPS26</i>     | VPS35 3KE mutant    | This study |
| PXYR4B  | <i>MATa leu2-3,112 ura3-52 his3-Δ200 trp1-Δ901 suc2-Δ9 lys2-801 vps35Δ::KanMX6 vps26Δ::Hygro pRS315-vps35 3KE pRS416-VPS26</i>     | VPS35 3KE mutant    | This study |
| PXYR4C  | <i>MATa leu2-3,112 ura3-52 his3-Δ200 trp1-Δ901 suc2-Δ9 lys2-801 vps35Δ::KanMX6 vps26Δ::Hygro pRS315-vps35 3KE pRS416-VPS26</i>     | VPS35 3KE mutant    | This study |
| PXYR13A | <i>MATa leu2-3,112 ura3-52 his3-Δ200 trp1-Δ901 suc2-Δ9 lys2-801 vps35Δ::KanMX6 vps26Δ::Hygro pRS315-vps35 EED+3KE pRS416-VPS26</i> | VPS35 AAA3KE mutant | This study |
| PXYR13B | <i>MATa leu2-3,112 ura3-52 his3-Δ200 trp1-Δ901 suc2-Δ9 lys2-801 vps35Δ::KanMX6 vps26Δ::Hygro pRS315-vps35 EED+3KE pRS416-VPS26</i> | VPS35 AAA3KE mutant | This study |
| PXYR13C | <i>MATa leu2-3,112 ura3-52 his3-Δ200 trp1-Δ901 suc2-Δ9 lys2-801 vps35Δ::KanMX6 vps26Δ::Hygro pRS315-vps35 EED+3KE pRS416-VPS26</i> | VPS35 AAA3KE mutant | This study |

**Table S3. Yeast strains used in this study. Related to Figure 6.**

|                                  | <b>Wild type</b> | <b>3KE mutant</b> | <b>AAA3KE mutant</b> |
|----------------------------------|------------------|-------------------|----------------------|
| <b>Number copies of retromer</b> | 2,117            | 2,161             | 2,280                |
| <b>Total number structures</b>   | 1,693            | 1,878             | 2,250                |
| <b>Heterotrimers (%)</b>         | 1,333 (78.7%)    | 1,621 (86.2%)     | 2,220 (98.7%)        |
| <b>Dimers (%)</b>                | 328 (19.4%)      | 246 (13.1%)       | 30 (1.3%)            |
| <b>Tetramers (%)</b>             | 32 (1.9%)        | 11 (0.6%)         | 0 (0%)               |

**Table S4. Comparison of wild-type and electrostatic mutant retromer structures in negative stain. Related to Figure 5.** Retromer heterotrimer copies and structures were counted across five representative micrographs each of wild-type and mutants. Distribution was calculated as percentage of total structures for each species. The 3KE mutant retains the ability to form some dimers *in vitro*, although the mutant shifts to favor heterotrimers. The AAA3KE mutant exists mostly as heterotrimer (>98%); we identified thirty potential dimers in this sample.
